# Supplementary material for: Association of Social Isolation of Long-term Care Facilities in the United States With 30-Day Mortality
Source: PubMed Central journal article supplement (PMC8209586; doi:10.1001/jamanetworkopen.2021.13361), 2021-06-16
Supplement: jamanetwopen-e2113361-s001.pdf [file jamanetwopen-e2113361-s001.pdf]

## Supplemental Online Content

Park C, Kim D, Briesacher BA. Association of social isolation of long-term care facilities in the United States with 30-day mortality. *JAMA Netw Open*. 2021;4(6):e2113361. doi:10.1001/jamanetworkopen.2021.13361

**eTable 1.** Odds Ratio (OR) of Having Long-Term Care Facilities in ZIP Code Tabulation Area (ZCTA)—Subgroup Analyses of ZCTAs Where the Proportion of Whites is Above the Median

**eTable 2.** Odds Ratio (OR) of Having Long-Term Care Facilities in ZIP Code Tabulation Area (ZCTA)—Subgroup Analyses of ZCTAs Where the Proportion of African Americans is Above the Median

**eTable 3.** Odds Ratio (OR) of Having Long-Term Care Facilities in ZIP Code Tabulation Area (ZCTA)—Subgroup Analyses of ZCTAs Where the Proportion of Hispanics is Above the Median

**eTable 4.** Odds Ratio (OR) of 30-Day Mortality by Individual, Facility, and ZIP Code Tabulation Area (ZCTA)-level Factors (N=730 524)

**eTable 5.** Odds Ratio (OR) of 30-Day Mortality: Test of Interactions With Race (N=730 524)

**eTable 6.** Odds Ratio (OR) of 30-Day Mortality by Individual, Facility, and ZIP Code Tabulation Area (ZCTA)-level Factors—Subgroup Analyses of White

**eTable 7.** Odds ratio (OR) of 30-Day Mortality by Individual, Facility, and ZIP Code Tabulation Area (ZCTA)-level Factors—Subgroup Analyses of African Americans

**eTable 8.** Odds Ratio (OR) of 30-Day Mortality by Individual, Facility, and ZIP Code Tabulation Area (ZCTA)-level Factors—Subgroup Analyses of Hispanics

This supplemental material has been provided by the authors to give readers additional information about their work.

**eTable 1.** Odds ratio (OR) of having long-term care facilities in ZIP Code Tabulation Area (ZCTA) - Subgroup analyses of ZCTAs where the proportion of Whites is above the median

| Variable                               | OR      | [95% CI]  |          | P      |
|----------------------------------------|---------|-----------|----------|--------|
| Age 65+ years (%)                      | 1.057   | [1.049,   | 1.065]   | <0.001 |
| Female (%)                             | 1.057   | [1.041,   | 1.073]   | <0.001 |
| Education: less than high school (%)   | 1.002   | [0.993,   | 1.011]   | 0.718  |
| Education: high school (%)             | 0.990   | [0.983,   | 0.997]   | 0.006  |
| Married (%)                            | 0.982   | [0.974,   | 0.990]   | <0.001 |
| House owner (%)                        | 0.969   | [0.962,   | 0.976]   | <0.001 |
| Medicaid enrollment (%)                | 1.000   | [0.992,   | 1.008]   | 0.986  |
| Median household income (\$1,000)      | 1.013   | [1.008,   | 1.019]   | <0.001 |
| Total population (n)                   |         |           |          |        |
| <1,000                                 | Ref.    |           |          |        |
| 1,000-9,999                            | 40.691  | [32.081,  | 51.611]  | <0.001 |
| ≥10,000                                | 388.235 | [293.768, | 513.081] | <0.001 |
| Area                                   |         |           |          |        |
| Urban                                  | 2.127   | [1.706,   | 2.652]   | <0.001 |
| Rural                                  | Ref.    |           |          |        |
| Census division                        |         |           |          |        |
| New England                            | Ref.    |           |          |        |
| Middle Atlantic                        | 0.709   | [0.547,   | 0.920]   | 0.010  |
| East North Central                     | 1.979   | [1.561,   | 2.509]   | <0.001 |
| West North Central                     | 3.859   | [3.027,   | 4.921]   | <0.001 |
| South Atlantic                         | 0.545   | [0.401,   | 0.740]   | <0.001 |
| East South Central                     | 1.084   | [0.788,   | 1.491]   | 0.621  |
| West South Central                     | 1.674   | [1.198,   | 2.339]   | 0.003  |
| Mountain                               | 1.020   | [0.730,   | 1.423]   | 0.909  |
| Pacific                                | 0.530   | [0.334,   | 0.841]   | 0.007  |
| Elderly single-occupancy household (%) |         |           |          |        |
| Q1: <30.77%                            | Ref.    |           |          |        |
| Q2: 30.77%-36.69%                      | 2.838   | [2.265,   | 3.556]   | <0.001 |
| Q3: 36.70%-42.39%                      | 7.302   | [5.835,   | 9.138]   | <0.001 |
| Q4: >42.39%                            | 14.358  | [11.308,  | 18.231]  | <0.001 |
| Constant                               | 0.000   | [0.000,   | 0.001]   | <0.001 |

**eTable 2.** Odds ratio (OR) of having long-term care facilities in ZIP Code Tabulation Area (ZCTA) - Subgroup analyses of ZCTAs where the proportion of African Americans is above the median

| Variable                               | OR      | [95% CI]  |          | P      |
|----------------------------------------|---------|-----------|----------|--------|
| Age 65+ years (%)                      | 1.079   | [1.070,   | 1.088]   | <0.001 |
| Female (%)                             | 1.027   | [1.016,   | 1.038]   | <0.001 |
| Education: less than high school (%)   | 1.019   | [1.013,   | 1.026]   | <0.001 |
| Education: high school (%)             | 1.004   | [0.997,   | 1.010]   | 0.253  |
| Married (%)                            | 0.997   | [0.991,   | 1.003]   | 0.354  |
| House owner (%)                        | 0.986   | [0.982,   | 0.990]   | <0.001 |
| Medicaid enrollment (%)                | 0.990   | [0.985,   | 0.996]   | <0.001 |
| Median household income (\$1,000)      | 1.010   | [1.006,   | 1.014]   | <0.001 |
| Total population (n)                   |         |           |          |        |
| <1,000                                 | Ref.    |           |          |        |
| 1,000-9,999                            | 23.962  | [17.121,  | 33.537]  | <0.001 |
| ≥10,000                                | 185.243 | [130.867, | 262.213] | <0.001 |
| Area                                   |         |           |          |        |
| Urban                                  | 1.510   | [1.350,   | 1.688]   | <0.001 |
| Rural                                  | Ref.    |           |          |        |
| Census division                        |         |           |          |        |
| New England                            | Ref.    |           |          |        |
| Middle Atlantic                        | 0.591   | [0.454,   | 0.770]   | <0.001 |
| East North Central                     | 1.260   | [0.966,   | 1.642]   | 0.088  |
| West North Central                     | 2.051   | [1.544,   | 2.725]   | <0.001 |
| South Atlantic                         | 0.608   | [0.473,   | 0.782]   | <0.001 |
| East South Central                     | 0.952   | [0.723,   | 1.253]   | 0.724  |
| West South Central                     | 1.588   | [1.221,   | 2.066]   | 0.001  |
| Mountain                               | 0.600   | [0.431,   | 0.837]   | 0.003  |
| Pacific                                | 0.598   | [0.451,   | 0.794]   | <0.001 |
| Elderly single-occupancy household (%) |         |           |          |        |
| Q1: <30.77%                            | Ref.    |           |          |        |
| Q2: 30.77%-36.69%                      | 2.002   | [1.760,   | 2.276]   | <0.001 |
| Q3: 36.70%-42.39%                      | 3.762   | [3.293,   | 4.299]   | <0.001 |
| Q4: >42.39%                            | 5.402   | [4.634,   | 6.296]   | <0.001 |
| Constant                               | 0.000   | [0.000,   | 0.001]   | <0.001 |

**eTable 3.** Odds ratio (OR) of having long-term care facilities in ZIP Code Tabulation Area (ZCTA) - Subgroup analyses of ZCTAs where the proportion of Hispanics is above the median

| Variable                               | OR      | [95% CI]  |          | P      |
|----------------------------------------|---------|-----------|----------|--------|
| Age 65+ years (%)                      | 1.067   | [1.058,   | 1.076]   | <0.001 |
| Female (%)                             | 1.038   | [1.025,   | 1.051]   | <0.001 |
| Education: less than high school (%)   | 1.019   | [1.013,   | 1.026]   | <0.001 |
| Education: high school (%)             | 1.013   | [1.007,   | 1.020]   | <0.001 |
| Married (%)                            | 0.997   | [0.990,   | 1.003]   | 0.285  |
| House owner (%)                        | 0.986   | [0.981,   | 0.990]   | <0.001 |
| Medicaid enrollment (%)                | 0.993   | [0.988,   | 0.999]   | 0.027  |
| Median household income (\$1,000)      | 1.013   | [1.009,   | 1.017]   | <0.001 |
| Total population (n)                   |         |           |          |        |
| <1,000                                 | Ref.    |           |          |        |
| 1,000-9,999                            | 35.547  | [25.241,  | 50.061]  | <0.001 |
| ≥10,000                                | 279.303 | [195.698, | 398.624] | <0.001 |
| Area                                   |         |           |          |        |
| Urban                                  | 1.486   | [1.323,   | 1.669]   | <0.001 |
| Rural                                  | Ref.    |           |          |        |
| Census division                        |         |           |          |        |
| New England                            | Ref.    |           |          |        |
| Middle Atlantic                        | 0.644   | [0.481,   | 0.862]   | 0.003  |
| East North Central                     | 1.373   | [1.028,   | 1.833]   | 0.032  |
| West North Central                     | 2.864   | [2.120,   | 3.869]   | <0.001 |
| South Atlantic                         | 0.769   | [0.582,   | 1.016]   | 0.064  |
| East South Central                     | 1.112   | [0.799,   | 1.548]   | 0.528  |
| West South Central                     | 2.131   | [1.602,   | 2.834]   | <0.001 |
| Mountain                               | 0.914   | [0.670,   | 1.246]   | 0.569  |
| Pacific                                | 0.739   | [0.551,   | 0.990]   | 0.043  |
| Elderly single-occupancy household (%) |         |           |          |        |
| Q1: <30.77%                            | Ref.    |           |          |        |
| Q2: 30.77%-36.69%                      | 2.290   | [2.015,   | 2.601]   | <0.001 |
| Q3: 36.70%-42.39%                      | 4.198   | [3.667,   | 4.806]   | <0.001 |
| Q4: >42.39%                            | 6.195   | [5.295,   | 7.248]   | <0.001 |
| Constant                               | 0.000   | [0.000,   | 0.000]   | <0.001 |

**eTable 4.** Odds ratio (OR) of 30-day mortality by individual, facility, and ZIP Code Tabulation Area (ZCTA)-level factors (N=730,524)

|                                           |                     | OR    | [95% CI] |        | P      |
|-------------------------------------------|---------------------|-------|----------|--------|--------|
| <b>Individual level</b>                   |                     |       |          |        |        |
| Facility stay                             | Short stayer        | Ref.  |          |        |        |
|                                           | Long stayer         | 0.013 | [0.011,  | 0.015] | <0.001 |
| Age                                       | ≤ 64                | Ref.  |          |        |        |
|                                           | 65-79               | 2.284 | [2.179,  | 2.393] | <0.001 |
|                                           | ≥ 80                | 4.540 | [4.327,  | 4.763] | <0.001 |
| Sex                                       | Male                | Ref.  |          |        |        |
|                                           | Female              | 0.657 | [0.645,  | 0.670] | <0.001 |
| Race                                      | White, non-Hispanic | Ref.  |          |        |        |
|                                           | Black, non-Hispanic | 0.798 | [0.769,  | 0.828] | <0.001 |
|                                           | Hispanic            | 0.751 | [0.711,  | 0.793] | <0.001 |
|                                           | Others              | 0.823 | [0.767,  | 0.883] | <0.001 |
| Marital status                            | Married             | Ref.  |          |        |        |
|                                           | Never married       | 1.011 | [0.977,  | 1.047] | 0.526  |
|                                           | Widowed             | 1.113 | [1.076,  | 1.152] | <0.001 |
|                                           | Separated           | 1.052 | [0.960,  | 1.153] | 0.281  |
|                                           | Divorced            | 0.903 | [0.866,  | 0.942] | <0.001 |
| Medicaid Dual                             | No                  | Ref.  |          |        |        |
|                                           | Yes                 | 1.639 | [1.606,  | 1.673] | <0.001 |
| Depression                                | No                  | Ref.  |          |        |        |
|                                           | Yes                 | 1.758 | [1.724,  | 1.792] | <0.001 |
| RxHCC                                     |                     | 2.308 | [2.256,  | 2.362] | <0.001 |
| <b>Facility level</b>                     |                     |       |          |        |        |
| % age 65 and older                        |                     | 0.982 | [0.979,  | 0.984] | <0.001 |
| Age median                                |                     | 1.089 | [1.083,  | 1.096] | <0.001 |
| Sex ratio                                 |                     | 0.988 | [0.985,  | 0.992] | <0.001 |
| % White, non-Hispanic                     |                     | 0.997 | [0.994,  | 1.000] | 0.027  |
| % Black or African American, non-Hispanic |                     | 0.998 | [0.995,  | 1.001] | 0.270  |
| % Hispanic                                |                     | 0.999 | [0.996,  | 1.003] | 0.697  |
| % married                                 |                     | 0.990 | [0.987,  | 0.994] | <0.001 |
| % never married                           |                     | 1.006 | [1.003,  | 1.009] | <0.001 |
| % widowed                                 |                     | 0.998 | [0.996,  | 1.001] | 0.310  |
| % separated/ divorced                     |                     | 1.004 | [1.001,  | 1.008] | 0.007  |
| Number of residents                       |                     | 1.000 | [1.000,  | 1.000] | 0.017  |
| % residents on Medicaid                   |                     | 1.012 | [1.012,  | 1.013] | <0.001 |
| Chain Ownership                           | No                  | Ref.  |          |        |        |
|                                           | Yes                 | 1.000 | [1.000,  | 1.001] | 0.003  |
| Profit                                    | No                  | Ref.  |          |        |        |
|                                           | Yes                 | 1.001 | [1.000,  | 1.001] | <0.001 |
| <b>ZCTA level</b>                         |                     |       |          |        |        |
| % age 65 and older                        |                     | 0.997 | [0.992,  | 1.002] | 0.208  |
| Age median                                |                     | 0.991 | [0.985,  | 0.996] | 0.001  |
| Sex ratio                                 |                     | 1.002 | [1.001,  | 1.004] | <0.001 |
| % owner housing                           |                     | 1.004 | [1.003,  | 1.006] | <0.001 |
| % married                                 |                     | 1.006 | [1.003,  | 1.009] | <0.001 |
| % high school or higher                   |                     | 0.994 | [0.991,  | 0.997] | <0.001 |
| Median household income                   |                     | 1.000 | [1.000,  | 1.000] | <0.001 |
| % White alone                             |                     | 1.001 | [0.998,  | 1.003] | 0.580  |
| % Black or African American alone         |                     | 1.000 | [0.997,  | 1.002] | 0.960  |

|                                               |                   |       |         |        |        |
|-----------------------------------------------|-------------------|-------|---------|--------|--------|
| % Hispanic                                    |                   | 0.992 | [0.990, | 0.994] | <0.001 |
| Total population (n)                          |                   |       |         |        |        |
| <1,000                                        |                   | Ref.  |         |        |        |
| 1,000-9,999                                   |                   | 0.906 | [0.750, | 1.095] | 0.306  |
| ≥10,000                                       |                   | 0.792 | [0.656, | 0.957] | 0.016  |
| Area                                          |                   |       |         |        |        |
| Urban                                         |                   | 0.851 | [0.823, | 0.881] | <0.001 |
| Rural                                         |                   | Ref.  |         |        |        |
| Census division                               |                   |       |         |        |        |
| New England                                   |                   | Ref.  |         |        |        |
| Middle Atlantic                               |                   | 1.165 | [1.099, | 1.235] | <0.001 |
| East North Central                            |                   | 1.322 | [1.248, | 1.400] | <0.001 |
| West North Central                            |                   | 1.441 | [1.342, | 1.548] | <0.001 |
| South Atlantic                                |                   | 1.143 | [1.075, | 1.216] | <0.001 |
| East South Central                            |                   | 1.257 | [1.154, | 1.369] | <0.001 |
| West South Central                            |                   | 1.679 | [1.567, | 1.800] | <0.001 |
| Mountain                                      |                   | 1.496 | [1.379, | 1.623] | <0.001 |
| Pacific                                       |                   | 1.366 | [1.272, | 1.468] | <0.001 |
| Elderly single-<br>occupancy household<br>(%) | Q1: <30.77%       | Ref.  |         |        |        |
|                                               | Q2: 30.77%-36.69% | 1.087 | [1.027, | 1.150] | 0.004  |
|                                               | Q3: 36.70%-42.39% | 1.161 | [1.097, | 1.229] | <0.001 |
|                                               | Q4: >42.39%       | 1.174 | [1.103, | 1.250] | <0.001 |
| Constant                                      |                   | 0.000 | [0.000, | 0.000] | <0.001 |

**eTable 5.** Odds ratio (OR) of 30-day mortality: test of interactions with race (N=730,524)

| Elderly single-occupancy household (%) | Race     | OR    | [95% CI] |        | P     |
|----------------------------------------|----------|-------|----------|--------|-------|
| Q1: <30.77%                            | White    | Ref.  |          |        |       |
| Q2: 30.77%-36.69%                      | Black    | 1.216 | [1.060,  | 1.394] | 0.005 |
| Q2: 30.77%-36.69%                      | Hispanic | 0.913 | [0.788,  | 1.059] | 0.229 |
| Q2: 30.77%-36.69%                      | Others   | 0.910 | [0.729,  | 1.135] | 0.402 |
| Q3: 36.70%-42.39%                      | Black    | 1.147 | [1.009,  | 1.303] | 0.036 |
| Q3: 36.70%-42.39%                      | Hispanic | 0.851 | [0.738,  | 0.981] | 0.026 |
| Q3: 36.70%-42.39%                      | Others   | 0.949 | [0.771,  | 1.169] | 0.624 |
| Q4: >42.39%                            | Black    | 1.112 | [0.982,  | 1.259] | 0.095 |
| Q4: >42.39%                            | Hispanic | 0.905 | [0.794,  | 1.032] | 0.136 |
| Q4: >42.39%                            | Others   | 0.984 | [0.808,  | 1.199] | 0.875 |

**eTable 6.** Odds ratio (OR) of 30-day mortality by individual, facility, and ZIP Code Tabulation Area (ZCTA)-level factors - Subgroup analyses of White

|                                           |               | OR    | [95% CI] |        | P      |
|-------------------------------------------|---------------|-------|----------|--------|--------|
| <b>Individual level</b>                   |               |       |          |        |        |
| Facility stay                             | Short stayer  | Ref.  |          |        |        |
|                                           | Long stayer   | 0.004 | [0.003,  | 0.005] | <0.001 |
| Age                                       | ≤ 64          | Ref.  |          |        |        |
|                                           | 65-79         | 2.312 | [2.187,  | 2.443] | <0.001 |
|                                           | ≥ 80          | 4.599 | [4.349,  | 4.864] | <0.001 |
| Sex                                       | Male          | Ref.  |          |        |        |
|                                           | Female        | 0.653 | [0.640,  | 0.667] | <0.001 |
| Marital status                            | Married       | Ref.  |          |        |        |
|                                           | Never married | 1.020 | [0.980,  | 1.060] | 0.330  |
|                                           | Widowed       | 1.117 | [1.075,  | 1.162] | <0.001 |
|                                           | Separated     | 0.981 | [0.872,  | 1.104] | 0.754  |
|                                           | Divorced      | 0.900 | [0.858,  | 0.943] | <0.001 |
| Medicaid Dual                             | No            | Ref.  |          |        |        |
|                                           | Yes           | 1.704 | [1.666,  | 1.742] | <0.001 |
| Depression                                | No            | Ref.  |          |        |        |
|                                           | Yes           | 1.767 | [1.731,  | 1.804] | <0.001 |
| RxHCC                                     |               | 2.349 | [2.288,  | 2.410] | <0.001 |
| <b>Facility level</b>                     |               |       |          |        |        |
| % age 65 and older                        |               | 0.979 | [0.977,  | 0.982] | <0.001 |
| Age median                                |               | 1.096 | [1.089,  | 1.103] | <0.001 |
| Sex ratio                                 |               | 0.988 | [0.984,  | 0.991] | <0.001 |
| % White, non-Hispanic                     |               | 0.995 | [0.991,  | 0.999] | 0.028  |
| % Black or African American, non-Hispanic |               | 0.998 | [0.993,  | 1.003] | 0.406  |
| % Hispanic                                |               | 0.998 | [0.993,  | 1.004] | 0.565  |
| % married                                 |               | 0.992 | [0.988,  | 0.995] | <0.001 |
| % never married                           |               | 1.007 | [1.004,  | 1.011] | <0.001 |
| % widowed                                 |               | 0.999 | [0.996,  | 1.002] | 0.650  |
| % separated/ divorced                     |               | 1.005 | [1.001,  | 1.009] | 0.006  |
| Number of residents                       |               | 1.000 | [0.999,  | 1.000] | <0.001 |
| % residents on Medicaid                   |               | 1.011 | [1.011,  | 1.012] | <0.001 |
| Chain Ownership                           | No            | Ref.  |          |        |        |
|                                           | Yes           | 1.000 | [1.000,  | 1.001] | 0.001  |
| Profit                                    | No            | Ref.  |          |        |        |
|                                           | Yes           | 1.001 | [1.000,  | 1.001] | 0.001  |
| <b>ZCTA level</b>                         |               |       |          |        |        |
| % age 65 and older                        |               | 0.998 | [0.993,  | 1.003] | 0.446  |
| Age median                                |               | 0.990 | [0.984,  | 0.995] | <0.001 |
| Sex ratio                                 |               | 1.003 | [1.001,  | 1.004] | <0.001 |
| % owner housing                           |               | 1.005 | [1.003,  | 1.007] | <0.001 |
| % married                                 |               | 1.006 | [1.003,  | 1.009] | <0.001 |
| % high school or higher                   |               | 0.994 | [0.990,  | 0.997] | <0.001 |
| Median household income                   |               | 1.000 | [1.000,  | 1.000] | <0.001 |
| % White alone                             |               | 1.001 | [0.998,  | 1.004] | 0.494  |
| % Black or African American alone         |               | 1.000 | [0.997,  | 1.003] | 0.844  |
| % Hispanic                                |               | 0.992 | [0.990,  | 0.994] | <0.001 |
| Total population (n)                      |               |       |          |        |        |
|                                           | <1,000        | Ref.  |          |        |        |
|                                           | 1,000-9,999   | 0.924 | [0.758,  | 1.125] | 0.432  |



|                                               |                   |       |         |        |        |
|-----------------------------------------------|-------------------|-------|---------|--------|--------|
| ≥10,000                                       |                   | 0.815 | [0.670, | 0.993] | 0.042  |
| Area                                          |                   |       |         |        |        |
| Urban                                         |                   | 0.854 | [0.824, | 0.886] | <0.001 |
| Rural                                         |                   | Ref.  |         |        |        |
| Census division                               |                   |       |         |        |        |
| New England                                   |                   | Ref.  |         |        |        |
| Middle Atlantic                               |                   | 1.181 | [1.112, | 1.255] | <0.001 |
| East North Central                            |                   | 1.325 | [1.249, | 1.406] | <0.001 |
| West North Central                            |                   | 1.433 | [1.331, | 1.543] | <0.001 |
| South Atlantic                                |                   | 1.106 | [1.036, | 1.181] | 0.002  |
| East South Central                            |                   | 1.205 | [1.100, | 1.320] | <0.001 |
| West South Central                            |                   | 1.659 | [1.541, | 1.787] | <0.001 |
| Mountain                                      |                   | 1.519 | [1.395, | 1.655] | <0.001 |
| Pacific                                       |                   | 1.367 | [1.268, | 1.475] | <0.001 |
| Elderly single-<br>occupancy household<br>(%) | Q1: <30.77%       | Ref.  |         |        |        |
|                                               | Q2: 30.77%-36.69% | 1.076 | [1.011, | 1.146] | 0.021  |
|                                               | Q3: 36.70%-42.39% | 1.144 | [1.075, | 1.218] | <0.001 |
|                                               | Q4: >42.39%       | 1.149 | [1.073, | 1.230] | <0.001 |
| Constant                                      |                   | 0.000 | [0.000, | 0.000] | <0.001 |

**eTable 7.** Odds ratio (OR) of 30-day mortality by individual, facility, and ZIP Code Tabulation Area (ZCTA)-level factors - Subgroup analyses of African Americans

|                                           |               | OR    | [95% CI] |        | P      |
|-------------------------------------------|---------------|-------|----------|--------|--------|
| <b>Individual level</b>                   |               |       |          |        |        |
| Facility stay                             | Short stayer  | 0.000 | [0.000,  | 0.005] | <0.001 |
|                                           | Long stayer   |       |          |        |        |
| Age                                       | ≤ 64          | Ref.  |          |        |        |
|                                           | 65-79         | 2.395 | [2.147,  | 2.672] | <0.001 |
|                                           | ≥ 80          | 4.588 | [4.089,  | 5.148] | <0.001 |
| Sex                                       | Male          | Ref.  |          |        |        |
|                                           | Female        | 0.688 | [0.645,  | 0.733] | <0.001 |
| Marital status                            | Married       | Ref.  |          |        |        |
|                                           | Never married | 1.015 | [0.923,  | 1.116] | 0.763  |
|                                           | Widowed       | 1.115 | [1.019,  | 1.221] | 0.018  |
|                                           | Separated     | 1.220 | [1.019,  | 1.462] | 0.031  |
|                                           | Divorced      | 0.916 | [0.820,  | 1.022] | 0.115  |
| Medicaid Dual                             | No            | Ref.  |          |        |        |
|                                           | Yes           | 1.367 | [1.282,  | 1.458] | <0.001 |
| Depression                                | No            | Ref.  |          |        |        |
|                                           | Yes           | 1.601 | [1.496,  | 1.713] | <0.001 |
| RxHCC                                     |               | 2.079 | [1.957,  | 2.209] | <0.001 |
| <b>Facility level</b>                     |               |       |          |        |        |
| % age 65 and older                        |               | 0.993 | [0.986,  | 1.000] | 0.052  |
| Age median                                |               | 1.047 | [1.029,  | 1.065] | <0.001 |
| Sex ratio                                 |               | 0.998 | [0.988,  | 1.007] | 0.661  |
| % White, non-Hispanic                     |               | 0.999 | [0.987,  | 1.011] | 0.878  |
| % Black or African American, non-Hispanic |               | 0.999 | [0.987,  | 1.011] | 0.840  |
| % Hispanic                                |               | 0.999 | [0.986,  | 1.013] | 0.902  |
| % married                                 |               | 0.994 | [0.985,  | 1.003] | 0.206  |
| % never married                           |               | 1.005 | [0.997,  | 1.014] | 0.203  |
| % widowed                                 |               | 1.003 | [0.994,  | 1.011] | 0.535  |
| % separated/ divorced                     |               | 1.007 | [0.998,  | 1.016] | 0.105  |
| Number of residents                       |               | 1.001 | [1.000,  | 1.001] | 0.009  |
| % residents on Medicaid                   |               | 1.020 | [1.018,  | 1.022] | <0.001 |
| Chain Ownership                           | No            | Ref.  |          |        |        |
|                                           | Yes           | 1.000 | [0.999,  | 1.001] | 0.906  |
| Profit                                    | No            | Ref.  |          |        |        |
|                                           | Yes           | 1.002 | [1.001,  | 1.002] | 0.001  |
| <b>ZCTA level</b>                         |               |       |          |        |        |
| % age 65 and older                        |               | 0.998 | [0.982,  | 1.014] | 0.794  |
| Age median                                |               | 0.985 | [0.969,  | 1.001] | 0.061  |
| Sex ratio                                 |               | 1.003 | [1.000,  | 1.006] | 0.094  |
| % owner housing                           |               | 1.005 | [1.001,  | 1.009] | 0.015  |
| % married                                 |               | 1.013 | [1.005,  | 1.021] | 0.001  |
| % high school or higher                   |               | 0.993 | [0.986,  | 1.000] | 0.067  |
| Median household income                   |               | 1.000 | [1.000,  | 1.000] | 0.011  |
| % White alone                             |               | 0.996 | [0.991,  | 1.002] | 0.229  |
| % Black or African American alone         |               | 0.997 | [0.991,  | 1.004] | 0.400  |
| % Hispanic                                |               | 0.990 | [0.984,  | 0.995] | <0.001 |
| Total population (n)                      |               |       |          |        |        |
| <1,000                                    |               | Ref.  |          |        |        |
| 1,000-9,999                               |               | 0.832 | [0.443,  | 1.561] | 0.566  |

|                                               |                   |       |         |        |        |
|-----------------------------------------------|-------------------|-------|---------|--------|--------|
| ≥10,000                                       |                   | 0.731 | [0.391, | 1.367] | 0.327  |
| Area                                          |                   |       |         |        |        |
| Urban                                         |                   | 0.910 | [0.823, | 1.005] | 0.064  |
| Rural                                         |                   | Ref.  |         |        |        |
| Census division                               |                   |       |         |        |        |
| New England                                   |                   | Ref.  |         |        |        |
| Middle Atlantic                               |                   | 1.035 | [0.829, | 1.292] | 0.763  |
| East North Central                            |                   | 1.198 | [0.961, | 1.495] | 0.109  |
| West North Central                            |                   | 1.394 | [1.064, | 1.825] | 0.016  |
| South Atlantic                                |                   | 1.199 | [0.964, | 1.490] | 0.103  |
| East South Central                            |                   | 1.431 | [1.104, | 1.855] | 0.007  |
| West South Central                            |                   | 1.650 | [1.303, | 2.090] | <0.001 |
| Mountain                                      |                   | 1.039 | [0.714, | 1.513] | 0.840  |
| Pacific                                       |                   | 1.530 | [1.171, | 1.999] | 0.002  |
| Elderly single-<br>occupancy household<br>(%) | Q1: <30.77%       | Ref.  |         |        |        |
|                                               | Q2: 30.77%-36.69% | 1.314 | [1.135, | 1.521] | <0.001 |
|                                               | Q3: 36.70%-42.39% | 1.363 | [1.174, | 1.582] | <0.001 |
|                                               | Q4: >42.39%       | 1.406 | [1.192, | 1.660] | <0.001 |
| Constant                                      |                   | 0.000 | [0.000, | 0.001] | <0.001 |

**eTable 8.** Odds ratio (OR) of 30-day mortality by individual, facility, and ZIP Code Tabulation Area (ZCTA)-level factors - Subgroup analyses of Hispanics

|                                           |               | OR    | [95% CI] |        | P      |
|-------------------------------------------|---------------|-------|----------|--------|--------|
| <b>Individual level</b>                   |               |       |          |        |        |
| Facility stay                             | Short stayer  | Ref.  |          |        |        |
|                                           | Long stayer   | 1.000 |          |        |        |
| Age                                       | ≤ 64          | Ref.  |          |        |        |
|                                           | 65-79         | 1.766 | [1.460,  | 2.135] | <0.001 |
|                                           | ≥ 80          | 3.588 | [2.959,  | 4.351] | <0.001 |
| Sex                                       | Male          | Ref.  |          |        |        |
|                                           | Female        | 0.685 | [0.621,  | 0.755] | <0.001 |
| Marital status                            | Married       | Ref.  |          |        |        |
|                                           | Never married | 0.910 | [0.780,  | 1.061] | 0.229  |
|                                           | Widowed       | 1.075 | [0.920,  | 1.255] | 0.365  |
|                                           | Separated     | 1.131 | [0.844,  | 1.516] | 0.411  |
|                                           | Divorced      | 0.905 | [0.752,  | 1.090] | 0.294  |
| Medicaid Dual                             | No            | Ref.  |          |        |        |
|                                           | Yes           | 1.171 | [1.053,  | 1.303] | 0.004  |
| Depression                                | No            | Ref.  |          |        |        |
|                                           | Yes           | 1.969 | [1.778,  | 2.181] | <0.001 |
| RxHCC                                     |               | 2.426 | [2.189,  | 2.688] | <0.001 |
| <b>Facility level</b>                     |               |       |          |        |        |
| % age 65 and older                        |               | 0.999 | [0.987,  | 1.011] | 0.891  |
| Age median                                |               | 1.071 | [1.041,  | 1.102] | <0.001 |
| Sex ratio                                 |               | 0.846 | [0.762,  | 0.940] | 0.002  |
| % White, non-Hispanic                     |               | 1.004 | [0.993,  | 1.015] | 0.519  |
| % Black or African American, non-Hispanic |               | 1.003 | [0.991,  | 1.015] | 0.612  |
| % Hispanic                                |               | 1.003 | [0.991,  | 1.015] | 0.654  |
| % married                                 |               | 0.982 | [0.970,  | 0.993] | 0.001  |
| % never married                           |               | 1.000 | [0.990,  | 1.011] | 0.94   |
| % widowed                                 |               | 0.993 | [0.983,  | 1.003] | 0.172  |
| % separated/ divorced                     |               | 0.997 | [0.985,  | 1.008] | 0.590  |
| Number of residents                       |               | 1.000 | [0.999,  | 1.001] | 0.969  |
| % residents on Medicaid                   |               | 1.016 | [1.013,  | 1.020] | <0.001 |
| Chain Ownership                           | No            | Ref.  |          |        |        |
|                                           | Yes           | 1.000 | [0.999,  | 1.001] | 0.578  |
| Profit                                    | No            | Ref.  |          |        |        |
|                                           | Yes           | 1.000 | [0.998,  | 1.001] | 0.863  |
| <b>ZCTA level</b>                         |               |       |          |        |        |
| % age 65 and older                        |               | 0.963 | [0.938,  | 0.987] | 0.003  |
| Age median                                |               | 1.026 | [1.000,  | 1.052] | 0.051  |
| Sex ratio                                 |               | 0.996 | [0.990,  | 1.002] | 0.172  |
| % owner housing                           |               | 1.002 | [0.996,  | 1.007] | 0.549  |
| % married                                 |               | 1.008 | [0.995,  | 1.020] | 0.230  |
| % high school or higher                   |               | 0.997 | [0.988,  | 1.007] | 0.603  |
| Median household income                   |               | 1.000 | [1.000,  | 1.000] | 0.002  |
| % White alone                             |               | 0.996 | [0.990,  | 1.003] | 0.258  |
| % Black or African American alone         |               | 0.991 | [0.982,  | 0.999] | 0.034  |
| % Hispanic                                |               | 0.994 | [0.988,  | 1.000] | 0.053  |
| Total population (n)                      |               |       |          |        |        |
| <1,000                                    |               | Ref.  |          |        |        |
| 1,000-9,999                               |               | 1.073 | [0.130,  | 8.832] | 0.947  |

|                                               |                   |       |         |        |        |
|-----------------------------------------------|-------------------|-------|---------|--------|--------|
| ≥10,000                                       |                   | 0.985 | [0.121, | 8.025] | 0.989  |
| Area                                          |                   |       |         |        |        |
| Urban                                         |                   | 0.847 | [0.733, | 0.979] | 0.025  |
| Rural                                         |                   | Ref.  |         |        |        |
| Census division                               |                   |       |         |        |        |
| New England                                   |                   | Ref.  |         |        |        |
| Middle Atlantic                               |                   | 1.101 | [0.824, | 1.472] | 0.515  |
| East North Central                            |                   | 1.510 | [1.121, | 2.033] | 0.007  |
| West North Central                            |                   | 1.719 | [1.044, | 2.833] | 0.033  |
| South Atlantic                                |                   | 1.249 | [0.924, | 1.688] | 0.148  |
| East South Central                            |                   | 1.666 | [0.667, | 4.163] | 0.275  |
| West South Central                            |                   | 1.899 | [1.400, | 2.575] | <0.001 |
| Mountain                                      |                   | 1.365 | [0.992, | 1.878] | 0.056  |
| Pacific                                       |                   | 1.381 | [1.030, | 1.854] | 0.031  |
| Elderly single-<br>occupancy household<br>(%) | Q1: <30.77%       | Ref.  |         |        |        |
|                                               | Q2: 30.77%-36.69% | 1.036 | [0.873, | 1.231] | 0.684  |
|                                               | Q3: 36.70%-42.39% | 1.120 | [0.925, | 1.356] | 0.247  |
|                                               | Q4: >42.39%       | 1.112 | [0.885, | 1.396] | 0.362  |
| Constant                                      |                   | 0.000 | [0.000, | 0.001] | <0.001 |
